# Supplementary material for: Characterization of simplified nonapeptides with broad-spectrum antimicrobial activities as potential food preservatives, and their antibacterial mechanism
Source: Royal Society of Chemistry journal article supplement (doi:10.1039/d2fo03861g), 2023-01-01
Supplement: d2fo03861g1.pdf [file d2fo03861g1.pdf]

## Supporting Information

### Characterization of simplified nonapeptides with broad-spectrum antimicrobial activities as potential food preservatives, and their antibacterial mechanism

Zhanyi Yang <sup>1</sup>, Yingxin Wei <sup>1</sup>, Wanpeng Wu <sup>1</sup>, Licong Zhang <sup>1</sup>, Jiajun Wang <sup>1</sup>, Anshan Shan <sup>1\*</sup>

<sup>1</sup> Institute of Animal Nutrition, Northeast Agricultural University, Harbin 150030, P. R. China

\* Corresponding author E-mail: [asshan@neau.edu.cn](mailto:asshan@neau.edu.cn) (A. Shan)

#### This PDF file includes:

Figure S1. Matrix-assisted laser desorption/ionization time-of-flight mass spectrometry (MALDI-TOF MS) spectra of the nonapeptides.

Figure S2. High-performance liquid chromatography (HPLC) spectra of the nonapeptides.

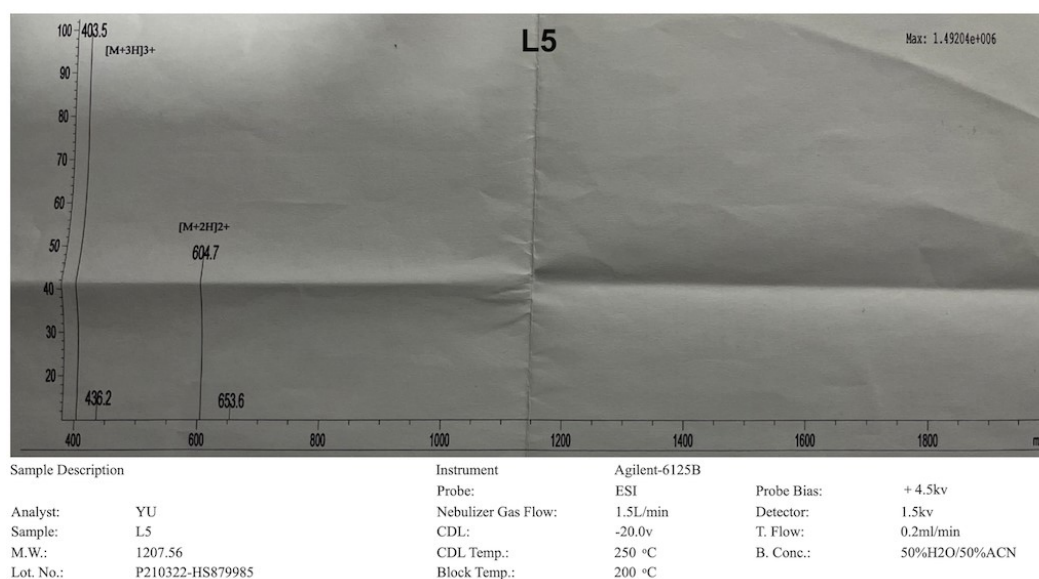

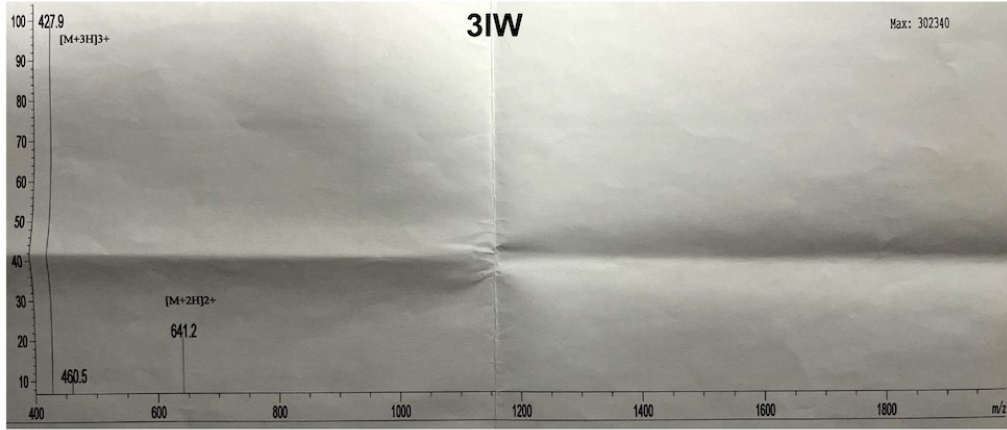

| Sample Description |                  | Instrument          |          | Agilent-6125B |               |
|--------------------|------------------|---------------------|----------|---------------|---------------|
| Analyst:           | YU               | Probe:              | ESI      | Probe Bias:   | + 4.5kv       |
| Sample:            | 3IW              | Nebulizer Gas Flow: | 1.5L/min | Detector:     | 1.5kv         |
| M.W.:              | 1280.61          | CDL:                | -20.0v   | T. Flow:      | 0.2ml/min     |
| Lot. No.:          | P210322-HS879977 | CDL Temp.:          | 250 °C   | B. Conc.:     | 50%H2O/50%ACN |
|                    |                  | Block Temp.:        | 200 °C   |               |               |

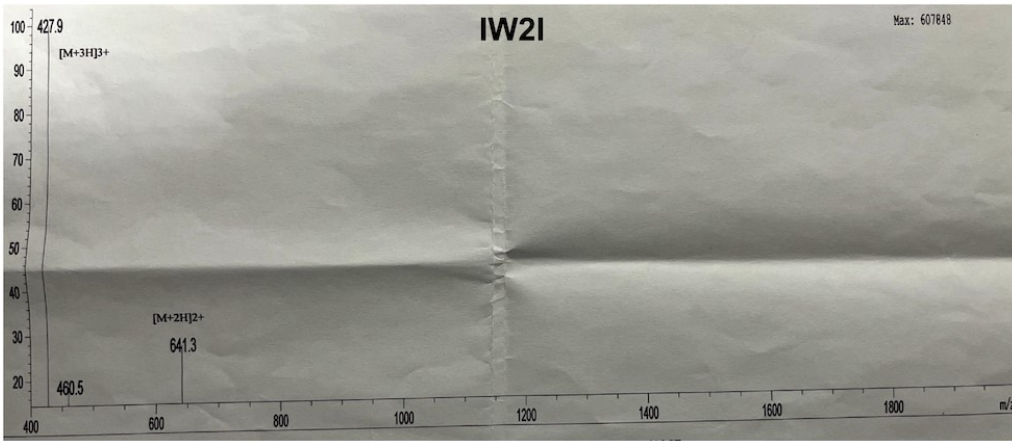

| Sample Description |                  | Instrument          |          | Agilent-6125B |               |
|--------------------|------------------|---------------------|----------|---------------|---------------|
| Analyst:           | YU               | Probe:              | ESI      | Probe Bias:   | + 4.5kv       |
| Sample:            | IW21 RL-9        | Nebulizer Gas Flow: | 1.5L/min | Detector:     | 1.5kv         |
| M.W.:              | 1280.61          | CDL:                | -20.0v   | T. Flow:      | 0.2ml/min     |
| Lot. No.:          | P210322-HS879978 | CDL Temp.:          | 250 °C   | B. Conc.:     | 50%H2O/50%ACN |
|                    |                  | Block Temp.:        | 200 °C   |               |               |

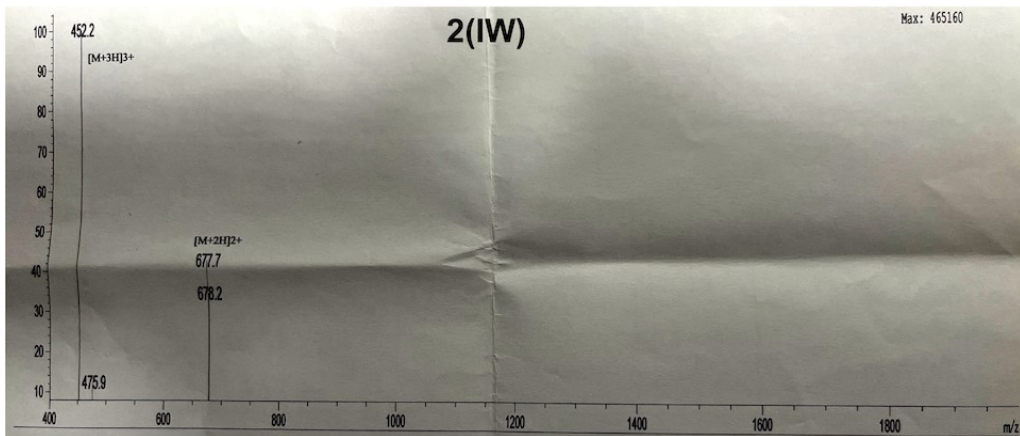

| Sample Description |                  | Instrument          |          | Agilent-6125B |               |
|--------------------|------------------|---------------------|----------|---------------|---------------|
| Analyst:           | YU               | Probe:              | ESI      | Probe Bias:   | + 4.5kv       |
| Sample:            | 2(IW)            | Nebulizer Gas Flow: | 1.5L/min | Detector:     | 1.5kv         |
| M.W.:              | 1353.66          | CDL:                | -20.0v   | T. Flow:      | 0.2ml/min     |
| Lot. No.:          | P210322-HS879983 | CDL Temp.:          | 250 °C   | B. Conc.:     | 50%H2O/50%ACN |
|                    |                  | Block Temp.:        | 200 °C   |               |               |

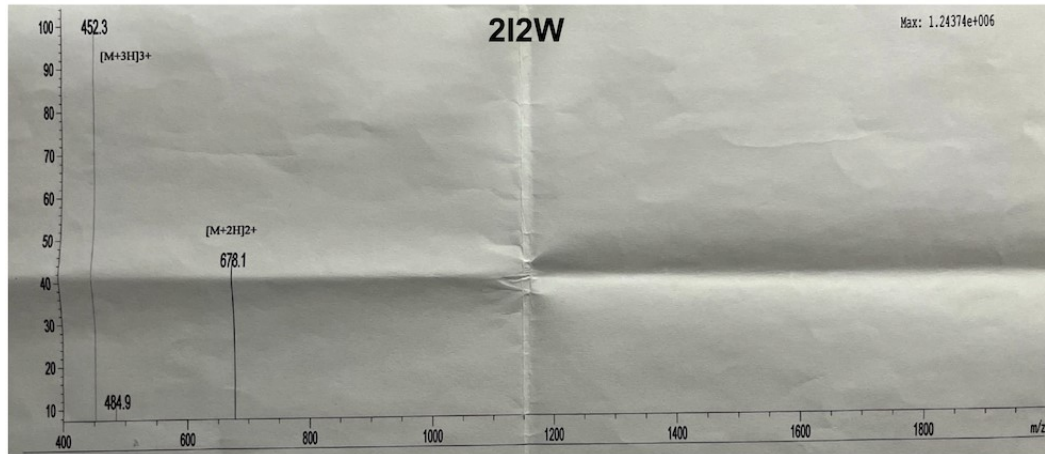

|                           |                     |               |             |               |
|---------------------------|---------------------|---------------|-------------|---------------|
| Sample Description        | Instrument          | Agilent-6125B | Probe Bias: | + 4.5kv       |
| Analyst: YU               | Probe:              | ESI           | Detector:   | 1.5kv         |
| Sample: 212W              | Nebulizer Gas Flow: | 1.5L/min      | T. Flow:    | 0.2ml/min     |
| M.W.: 1353.66             | CDL:                | -20.0v        | B. Conc.:   | 50%H2O/50%ACN |
| Lot No.: P210322-HS879984 | CDL Temp.:          | 250 °C        |             |               |
|                           | Block Temp.:        | 200 °C        |             |               |

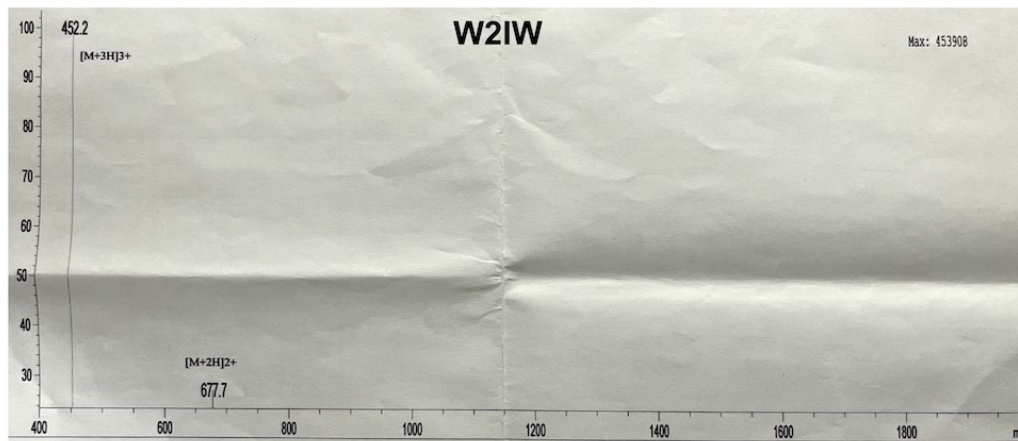

|                           |                     |               |             |               |
|---------------------------|---------------------|---------------|-------------|---------------|
| Sample Description        | Instrument          | Agilent-6125B | Probe Bias: | + 4.5kv       |
| Analyst: YU               | Probe:              | ESI           | Detector:   | 1.5kv         |
| Sample: W2IW              | Nebulizer Gas Flow: | 1.5L/min      | T. Flow:    | 0.2ml/min     |
| M.W.: 1353.66             | CDL:                | -20.0v        | B. Conc.:   | 50%H2O/50%ACN |
| Lot No.: P210322-HS879982 | CDL Temp.:          | 250 °C        |             |               |
|                           | Block Temp.:        | 200 °C        |             |               |

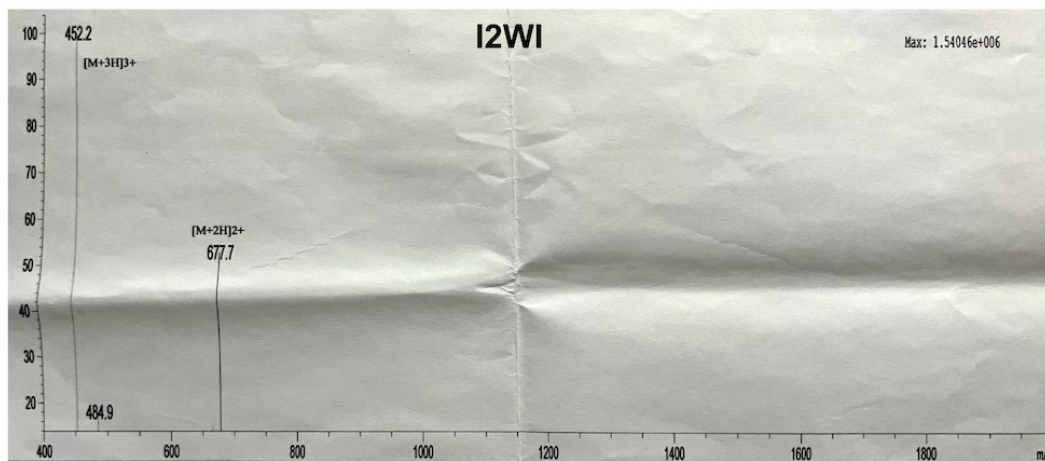

|                           |                     |               |             |               |
|---------------------------|---------------------|---------------|-------------|---------------|
| Sample Description        | Instrument          | Agilent-6125B | Probe Bias: | + 4.5kv       |
| Analyst: YU               | Probe:              | ESI           | Detector:   | 1.5kv         |
| Sample: I2WI              | Nebulizer Gas Flow: | 1.5L/min      | T. Flow:    | 0.2ml/min     |
| M.W.: 1353.66             | CDL:                | -20.0v        | B. Conc.:   | 50%H2O/50%ACN |
| Lot No.: P210322-HS879981 | CDL Temp.:          | 250 °C        |             |               |
|                           | Block Temp.:        | 200 °C        |             |               |

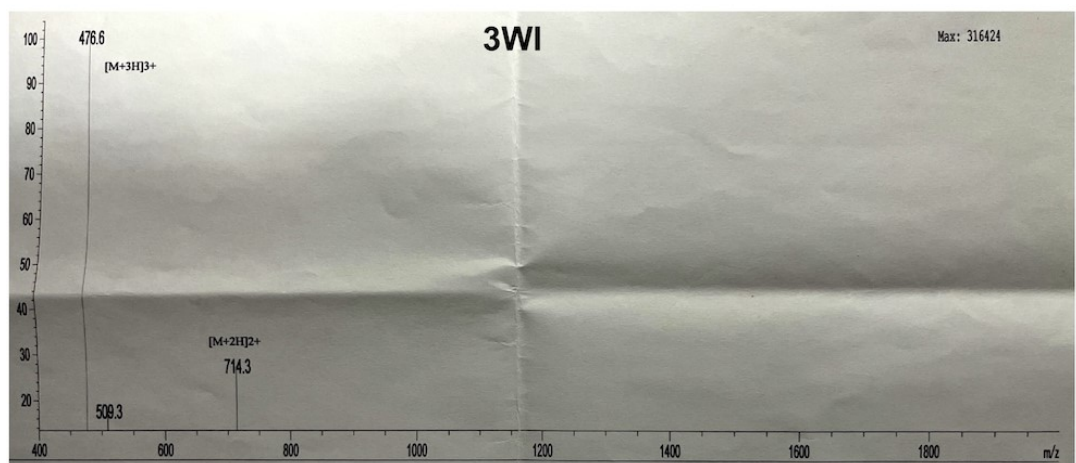

|                            |                     |               |              |               |
|----------------------------|---------------------|---------------|--------------|---------------|
| Sample Description         | Instrument          | Agilent-6125B | Probe Bias:  | + 4.5kv       |
| Analyst: YU                | Probe:              | ESI           | Detector:    | 1.5kv         |
| Sample: 3WI                | Nebulizer Gas Flow: | 1.5L/min      | T. Flow:     | 0.2ml/min     |
| M.W.: 1426.71              | CDL:                | -20.0v        | B. Conc.:    | 50%H2O/50%ACN |
| Lot. No.: P210322-HS879979 | CDL Temp.:          | 250 °C        | Block Temp.: | 200 °C        |

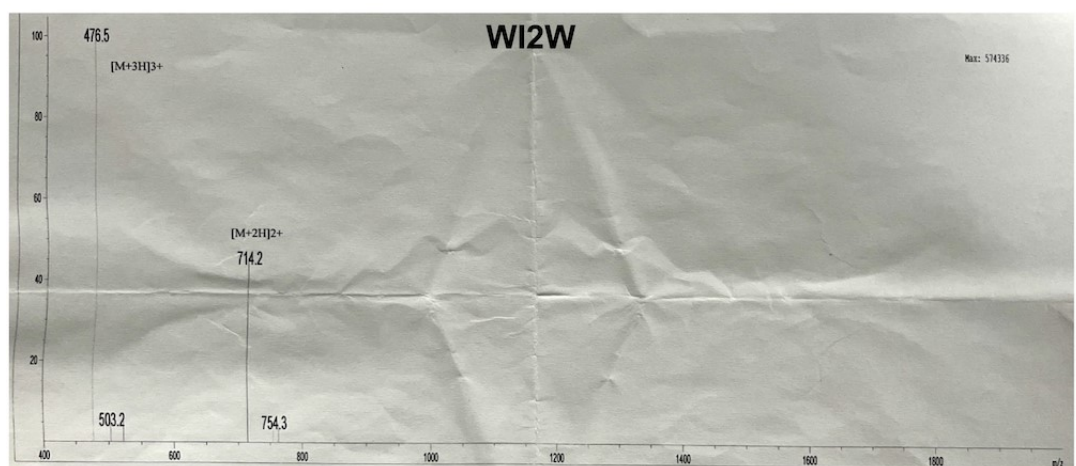

|                            |                     |               |              |               |
|----------------------------|---------------------|---------------|--------------|---------------|
| Sample Description         | Instrument          | Agilent-6125B | Probe Bias:  | + 4.5kv       |
| Analyzed date:             | Probe:              | ESI           | Detector:    | 1.5kv         |
| Analyst: YU                | Nebulizer Gas Flow: | 1.5L/min      | T. Flow:     | 0.2ml/min     |
| Sample: W12W               | CDL:                | -20.0v        | B. Conc.:    | 50%H2O/50%ACN |
| M.W.: 1426.71              | CDL Temp.:          | 250 °C        | Block Temp.: | 200 °C        |
| Lot. No.: P210322-HS879980 | Block Temp.:        | 200 °C        |              |               |

**Figure S1.** Matrix-assisted laser desorption/ionization time-of-flight mass spectrometry (MALDI-TOF MS) spectra of the nonapeptides.

### HPLC REPORT

Product Name :L5  
 Lot No :P210322-HS879985  
 Column :SinoChrom ODS-DP 5µm, 4.6\*250mm  
 Solvent A :0.1%Trifluoroacetic in 100%  
 Acetonitrile  
 Solvent B :0.1%Trifluoroacetic in 100% Water  
 Gradient : A B  
 0.01min 20% 80%  
 25min 50% 50%  
 25.01min 100% 0%  
 30min Stop  
 Flow rate :1.0ml/min  
 Wavelength :220nm  
 Volume :20ul

| Rank  | Time   | Conc.   | Area    | Height |
|-------|--------|---------|---------|--------|
| 1     | 12.875 | 1.4829  | 19566   | 2342   |
| 2     | 13.015 | 96.9057 | 1278658 | 151688 |
| 3     | 13.192 | 1.6114  | 21262   | 8007   |
| Total | 100    |         | 1319486 | 162037 |

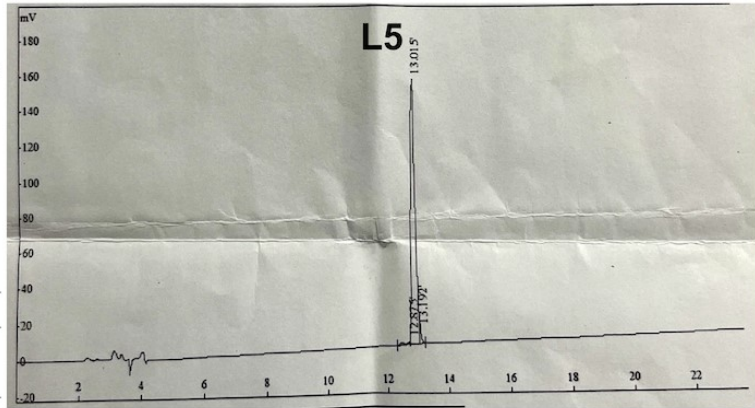

### HPLC REPORT

Product Name :3IW  
 Lot No :P220504-HS879977  
 Column :Gemini-NX 5µ C18 110A, 4.6\*250mm  
 Solvent A :0.1%Trifluoroacetic in 100% Acetonitrile  
 Solvent B :0.1%Trifluoroacetic in 100% Water  
 Gradient : A B  
 0.01min 20% 80%  
 25min 45% 55%  
 25.01min 100% 0%  
 30min Stop  
 Flow rate :1.0ml/min  
 Wavelength :220nm  
 Volume :20ul

| Rank  | Time   | Conc.   | Area    | Height  |
|-------|--------|---------|---------|---------|
| 1     | 11.204 | 96.2384 | 9373946 | 1117850 |
| 2     | 11.410 | 1.1472  | 111741  | 30980   |
| 3     | 12.193 | 2.6144  | 254649  | 30694   |
| Total | 100    |         | 9740336 | 1179524 |

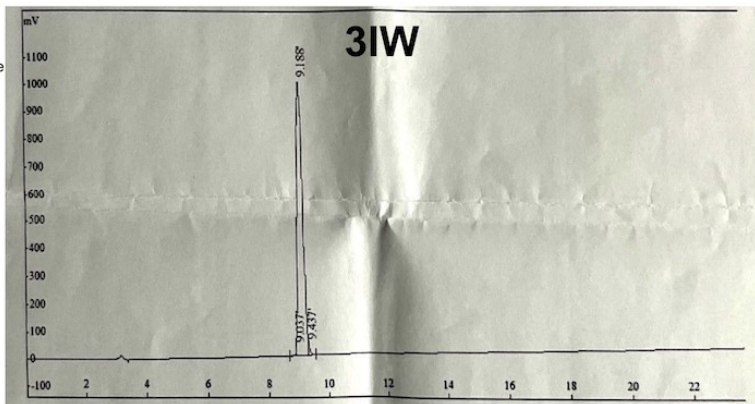

### HPLC REPORT

Product Name :IW21  
 Lot No :P210322-HS879978  
 Column :SinoChrom ODS-DP 5µm, 4.6\*250mm  
 Solvent A :0.1%Trifluoroacetic in 100% Acetonitrile  
 Solvent B :0.1%Trifluoroacetic in 100% Water  
 Gradient : A B  
 0.01min 20% 80%  
 25min 50% 50%  
 25.01min 100% 0%  
 30min Stop  
 Flow rate :1.0ml/min  
 Wavelength :220nm  
 Volume :20ul

| Rank  | Time   | Conc.   | Area    | Height |
|-------|--------|---------|---------|--------|
| 1     | 11.542 | 0.7519  | 42938   | 13004  |
| 2     | 11.725 | 96.2060 | 5494112 | 428163 |
| 3     | 12.158 | 3.0421  | 173726  | 11774  |
| Total | 100    |         | 5710776 | 452941 |

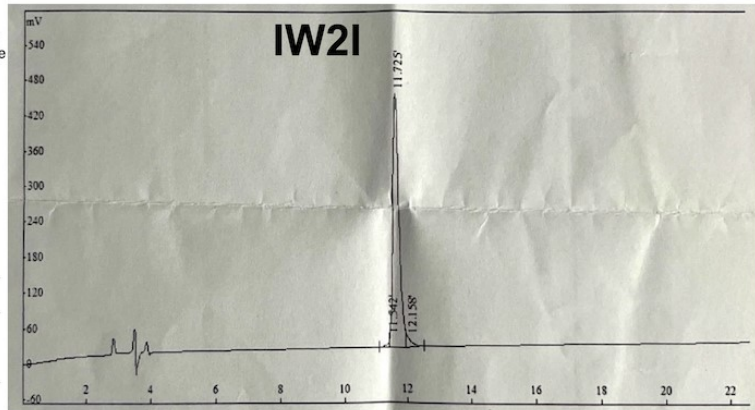

### HPLC REPORT

Product Name :2(IW)  
Lot No :P210322-HS879983  
Column :SinoChrom ODS-DP 5µm, 4.6\*250mm  
Solvent A :0.1%Trifluoroacetic in 100% Acetonitrile  
Solvent B :0.1%Trifluoroacetic in 100% Water  
Gradient : A B  
0.01min 25% 75%  
25min 60% 40%  
25.01min 100% 0%  
30min Stop  
Flow rate :1.0ml/min  
Wavelength :220nm  
Volume :20ul

| Rank  | Time   | Conc.   | Area     | Height  |
|-------|--------|---------|----------|---------|
| 1     | 12.676 | 0.2333  | 30591    | 20585   |
| 2     | 12.807 | 98.6909 | 12940111 | 1691813 |
| 3     | 12.997 | 1.0758  | 141050   | 20922   |
| Total | 100    |         | 13111752 | 1733320 |

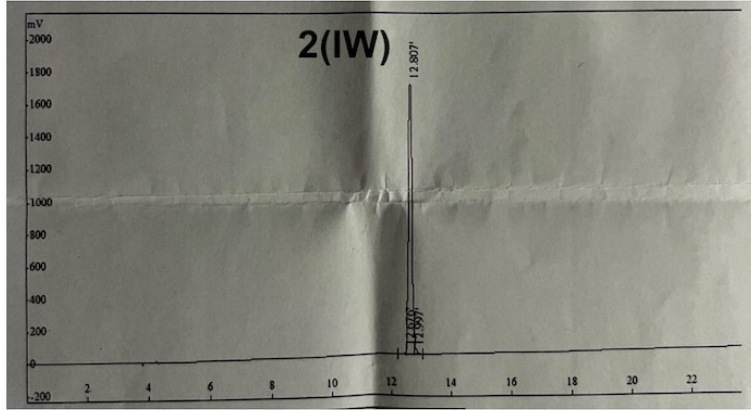

### HPLC REPORT

Product Name :2I2W  
Lot No :P210322-HS879984  
Column :SinoChrom ODS-DP 5µm, 4.6\*250mm  
Solvent A :0.1%Trifluoroacetic in 100% Acetonitrile  
Solvent B :0.1%Trifluoroacetic in 100% Water  
Gradient : A B  
0.01min 22% 78%  
25min 47% 53%  
25.01min 100% 0%  
30min Stop  
Flow rate :1.0ml/min  
Wavelength :220nm  
Volume :20ul

| Rank  | Time   | Conc.   | Area     | Height  |
|-------|--------|---------|----------|---------|
| 1     | 13.091 | 98.9426 | 19638886 | 1400571 |
| 2     | 13.353 | 1.0574  | 209888   | 76917   |
| Total | 100    |         | 19848774 | 1477488 |

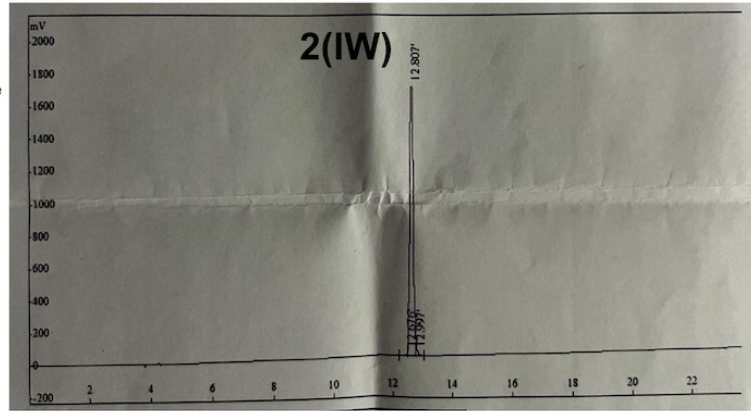

### HPLC REPORT

Product Name :W2IW  
Lot No :P210322-HS879982  
Column :SinoChrom ODS-DP 5µm, 4.6\*250mm  
Solvent A :0.1%Trifluoroacetic in 100% Acetonitrile  
Solvent B :0.1%Trifluoroacetic in 100% Water  
Gradient : A B  
0.01min 20% 80%  
25min 50% 50%  
25.01min 100% 0%  
30min Stop  
Flow rate :1.0ml/min  
Wavelength :220nm  
Volume :20ul

| Rank  | Time   | Conc.   | Area     | Height  |
|-------|--------|---------|----------|---------|
| 1     | 14.588 | 0.9211  | 127108   | 77854   |
| 2     | 14.718 | 96.5967 | 13329525 | 1270376 |
| 3     | 14.940 | 2.4822  | 342523   | 56079   |
| Total | 100    |         | 13799156 | 1404309 |

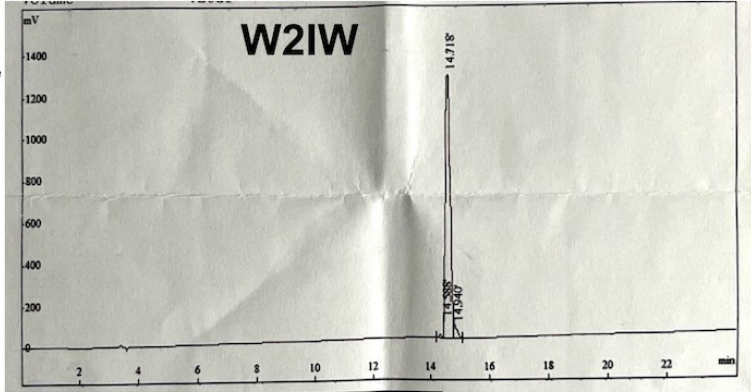

### HPLC REPORT

Product Name : I2WI  
 Lot No : P210322-HS879981  
 Column : Gemini-NX 5 $\mu$  C18 110A, 4.6\*250mm  
 Solvent A : 0.1%Trifluoroacetic in 100% Acetonitrile  
 Solvent B : 0.1%Trifluoroacetic in 100% Water  
 Gradient : A B  
           0.01min 22% 78%  
           25min 47% 53%  
           25.01min 100% 0%  
           30min Stop  
 Flow rate : 1.0ml/min  
 Wavelength : 220nm  
 Volume : 20ul

| Rank  | Time   | Conc.   | Area    | Height |
|-------|--------|---------|---------|--------|
| 1     | 11.700 | 1.8228  | 56902   | 11282  |
| 2     | 11.909 | 97.1164 | 3031600 | 259765 |
| 3     | 12.200 | 1.0608  | 33113   | 2108   |
| Total | 100    | 3121615 | 273155  |        |

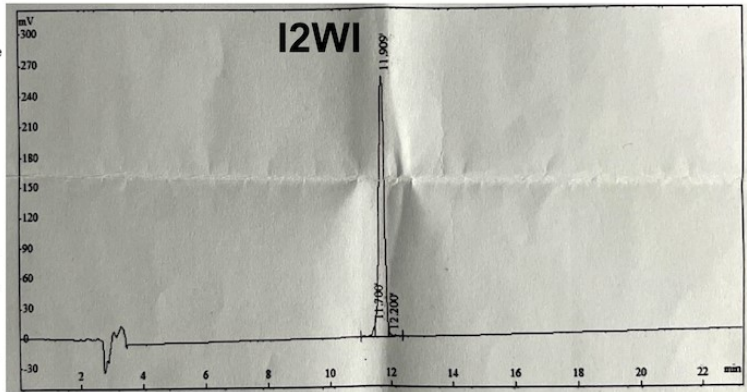

### HPLC REPORT

Product Name : 3WI  
 Lot No : P210322-HS879979  
 Column : SinoChrom ODS-DP 5 $\mu$ m, 4.6\*250mm  
 Solvent A : 0.1%Trifluoroacetic in 100% Acetonitrile  
 Solvent B : 0.1%Trifluoroacetic in 100% Water  
 Gradient : A B  
           0.01min 25% 75%  
           25min 60% 40%  
           25.01min 100% 0%  
           30min Stop  
 Flow rate : 1.0ml/min  
 Wavelength : 220nm  
 Volume : 20ul

| Rank  | Time   | Conc.    | Area     | Height  |
|-------|--------|----------|----------|---------|
| 1     | 12.949 | 0.2266   | 47708    | 9091    |
| 2     | 13.429 | 98.0961  | 20650059 | 1900738 |
| 3     | 13.625 | 1.6773   | 353088   | 60251   |
| Total | 100    | 21050855 | 1970080  |         |

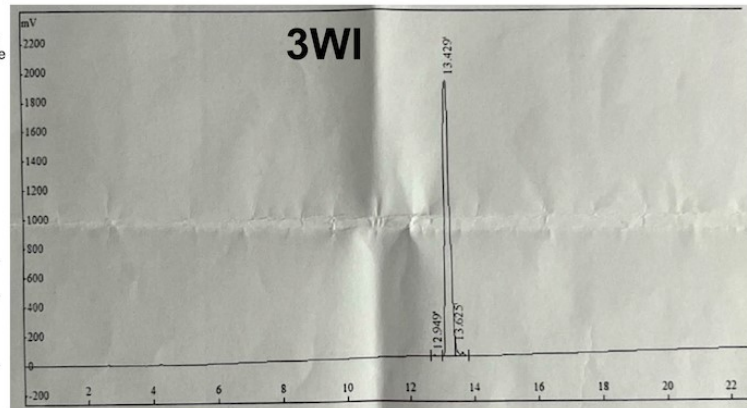

### HPLC REPORT

Product Name : WI2W  
 Lot No : P210322-HS879980  
 Column : Gemini-NX 5 $\mu$  C18 110A, 4.6\*250mm  
 Solvent A : 0.1%Trifluoroacetic in 100% Acetonitrile  
 Solvent B : 0.1%Trifluoroacetic in 100% Water  
 Gradient : A B  
           0.01min 25% 75%  
           25min 50% 50%  
           25.01min3 100% 0%  
           30min Stop  
 Flow rate : 1.0ml/min  
 Wavelength : 220nm  
 Volume : 20ul

| Rank  | Time   | Conc.    | Area     | Height |
|-------|--------|----------|----------|--------|
| 1     | 12.884 | 0.9006   | 149291   | 8202   |
| 2     | 13.493 | 2.0853   | 345674   | 70146  |
| 3     | 13.698 | 95.5857  | 15844930 | 917914 |
| 4     | 14.481 | 1.4284   | 236781   | 18479  |
| Total | 100    | 16576676 | 1014741  |        |

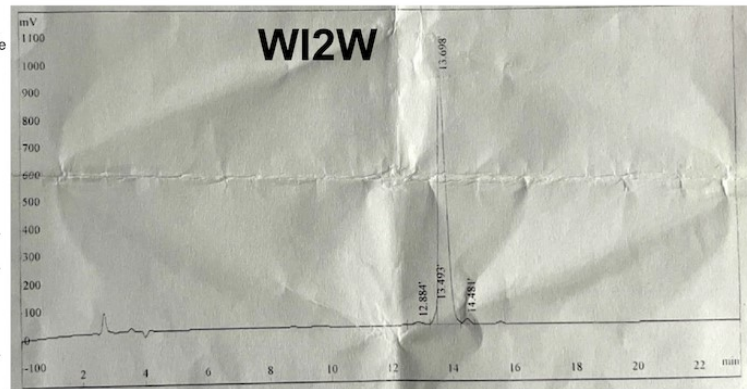

**Figure S2.** High-performance liquid chromatography (HPLC) spectra of the nonapeptides.
